# Supplementary material
Source: PubMed Central journal article supplement (PMC6917829)
Supplement: NIHMS1543528-supplement-2.pdf [file NIHMS1543528-supplement-2.pdf]

Scatter plots showing labels for the individual 13 rats

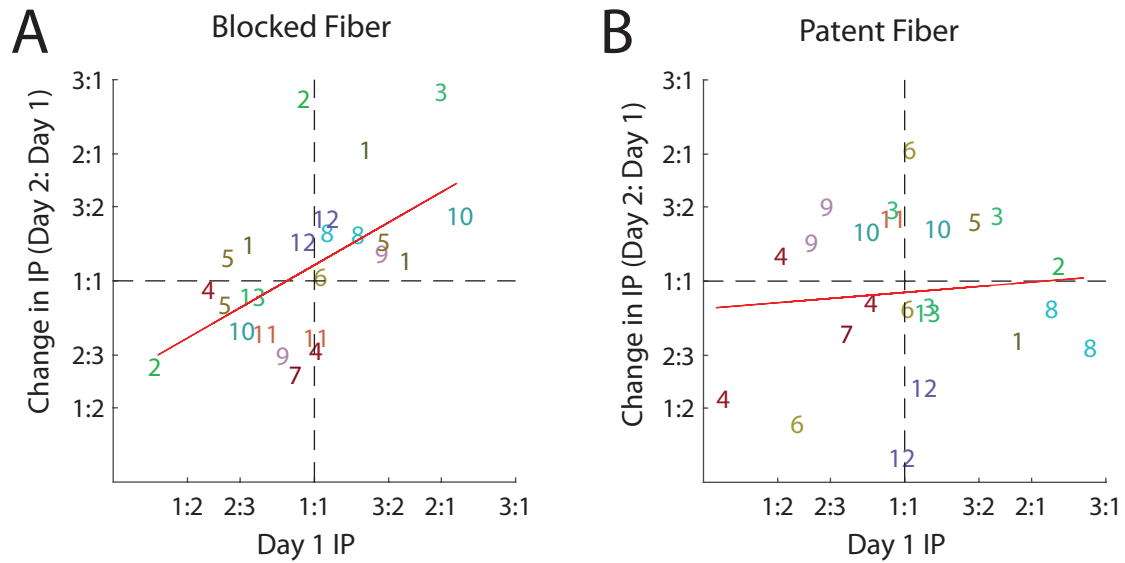

**Figure S1. Post-Feeding Changes in IP Relative to Baseline Preferences Plotted for Each Rat. Related to Figure 2. A,** Same plot as in Figure 2A with additional information linking each data point to each rat. Scatter plots show the IP shift from day 1 to day 2 (y-axis, log ratio of IP day 2 : day 1) plotted against the IP measured during the baseline session (x-axis) for the control (blocked-fiber) sessions. Data points for each rat are plotted using a unique number and color. **B,** Same as in **A**, but for the inactivation (patent-fiber) sessions.

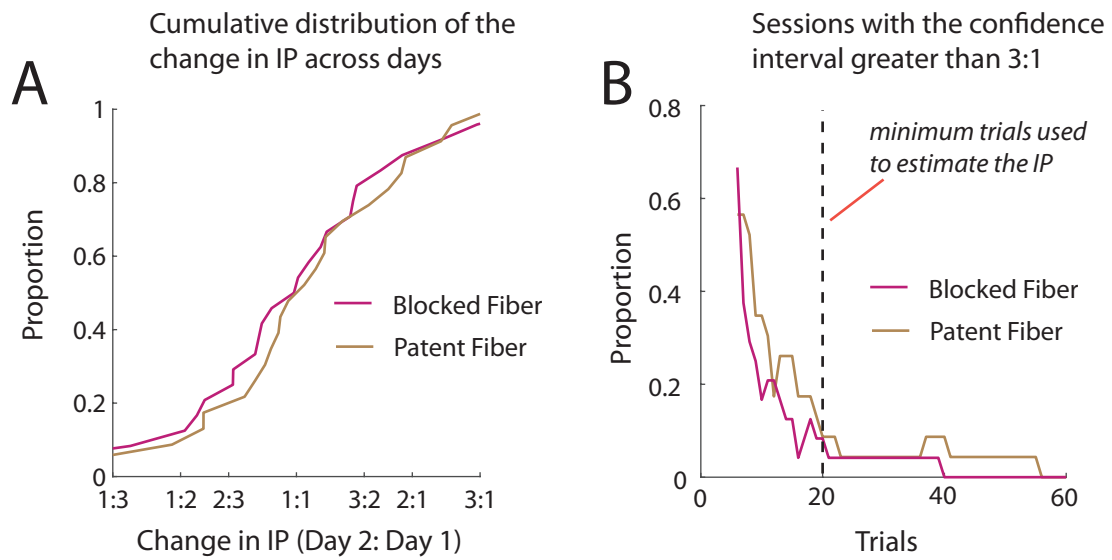

**Figure S2. Distributions of the Change in IP Across Days and for the Proportion of Large IP Confidence Intervals as a Function of Trial Number. Related to Figure 2.** **A**, Cumulative distributions of the IP shift from day 1 to day 2 (x-axis, log ratio of IP day 2 : day 1) for the blocked- and patent-fiber sessions. **B**, The proportion (y-axis) of sessions with IP confidence intervals larger than a 3:1 ratio plotted as a function of the trials included in the generalized linear model. This provided an empirical measure of the fewest trials that could be used to establish somewhat reliable estimates of the IP.

| <b>Predictor</b>        | <b>Beta Coefficient</b> | <b>t<sub>148</sub></b> | <b>p-value</b> |
|-------------------------|-------------------------|------------------------|----------------|
| y-intercept             | -0.22                   | 3.88                   | 1.5e-4         |
| Offers                  | 0.15                    | 2.61                   | 0.010          |
| Preference              | -0.41                   | 4.59                   | 9.6e-10        |
| Fiber                   | 0.23                    | 3.49                   | 6.3e-4         |
| Subject                 | N/A                     | <= 1.90                | >= 0.059       |
| Offers*Preference       | 0.086                   | 0.93                   | 0.35           |
| Preference*Fiber        | 0.39                    | 3.20                   | 1.6e-3         |
| Offers*Fiber            | 0.18                    | 2.40                   | 0.017          |
| Offers*Preference*Fiber | -.048                   | 0.40                   | 0.69           |

**Table S1. Table of Results for the Linear Regression Performed with the Change in Choice Behavior as the Response Variable. Related to Figure 2.**

| <b>Predictor</b> | <b>Beta Coefficient</b> | <b>t<sub>20</sub></b> | <b>p-value</b> |
|------------------|-------------------------|-----------------------|----------------|
| y-intercept      | -0.28                   | 0.42                  | 0.67           |
| Preference       | 1.10                    | 1.65                  | 0.11           |
| Fiber            | 0.22                    | 0.60                  | 0.55           |
| Subject          | N/A                     | <= 2.5                | >= 0.01        |
| Preference*Fiber | -1.40                   | 1.50                  | 0.14           |

**Table S2. Table of Results for the Linear Regression Performed with the Inverse Slope as the Response Variable. Related to Figure 3.**

| <b>Predictor</b> | <b>Beta Coefficient</b> | <b>t<sub>20</sub></b> | <b>p-value</b> |
|------------------|-------------------------|-----------------------|----------------|
| y-intercept      | 0.25                    | 5.53                  | 2.4e-5         |
| Preference       | 0.22                    | 0.80                  | 0.43           |
| Fiber            | 0.072                   | 0.48                  | 0.64           |
| Subject          | N/A                     | <= 3.96               | >= 1.0e-4      |
| Preference*Fiber | -0.31                   | 2.07                  | 0.041          |

**Table S3. Table of Results for the Linear Regression Performed with the Choice Latency as the Response Variable. Related to Figure 4.**

| ANOVA Fiber-Type X Baseline Preference X Offers   |       |      |         |
|---------------------------------------------------|-------|------|---------|
| Factor                                            | d.f.  | F    | p-value |
| Fiber                                             | 1,43  | 0.72 | 0.40    |
| Preference                                        | 1,43  | 0.01 | 0.91    |
| Offers                                            | 2,43  | 2.28 | 0.11    |
| Session                                           | 43,83 | 2.64 | < 1e-5  |
| Fiber*Preference                                  | 1,43  | 6.64 | 0.013   |
| Fiber*Offers                                      | 2,43  | 1.85 | 0.16    |
| Preference*Offers                                 | 2,43  | 0.29 | 0.75    |
| Blocked-Fiber: ANOVA Baseline Preference X Offers |       |      |         |
| Preference                                        | 1,22  | 4.31 | 0.05    |
| Offer                                             | 2,22  | 2.27 | 0.12    |
| Session                                           | 22,42 | 2.8  | 2.0e-3  |
| Offer*Preference                                  | 1,22  | 1.35 | 0.27    |
| Patent-Fiber: ANOVA Baseline Preference X Offers  |       |      |         |
| Preference                                        | 1,21  | 2.75 | 0.11    |
| Offer                                             | 2,21  | 1.76 | 0.19    |
| Session                                           | 21,39 | 2.54 | 5.8e-3  |
| Offer*Preference                                  | 2,21  | 0.30 | 0.74    |

**Table S4. Table of Results for the 3-way repeated measures ANOVA (Fiber-Type X Preference X Offers) and the Corresponding Simple Effects Tests for the Blocked and Patent Levels of the Fiber-Type Factor. Related to Figure 4.**
